# THE AMERICAN JOURNAL OF PSYCHIATRY

November 2010 Vol. 167, No. 11:1289-1418

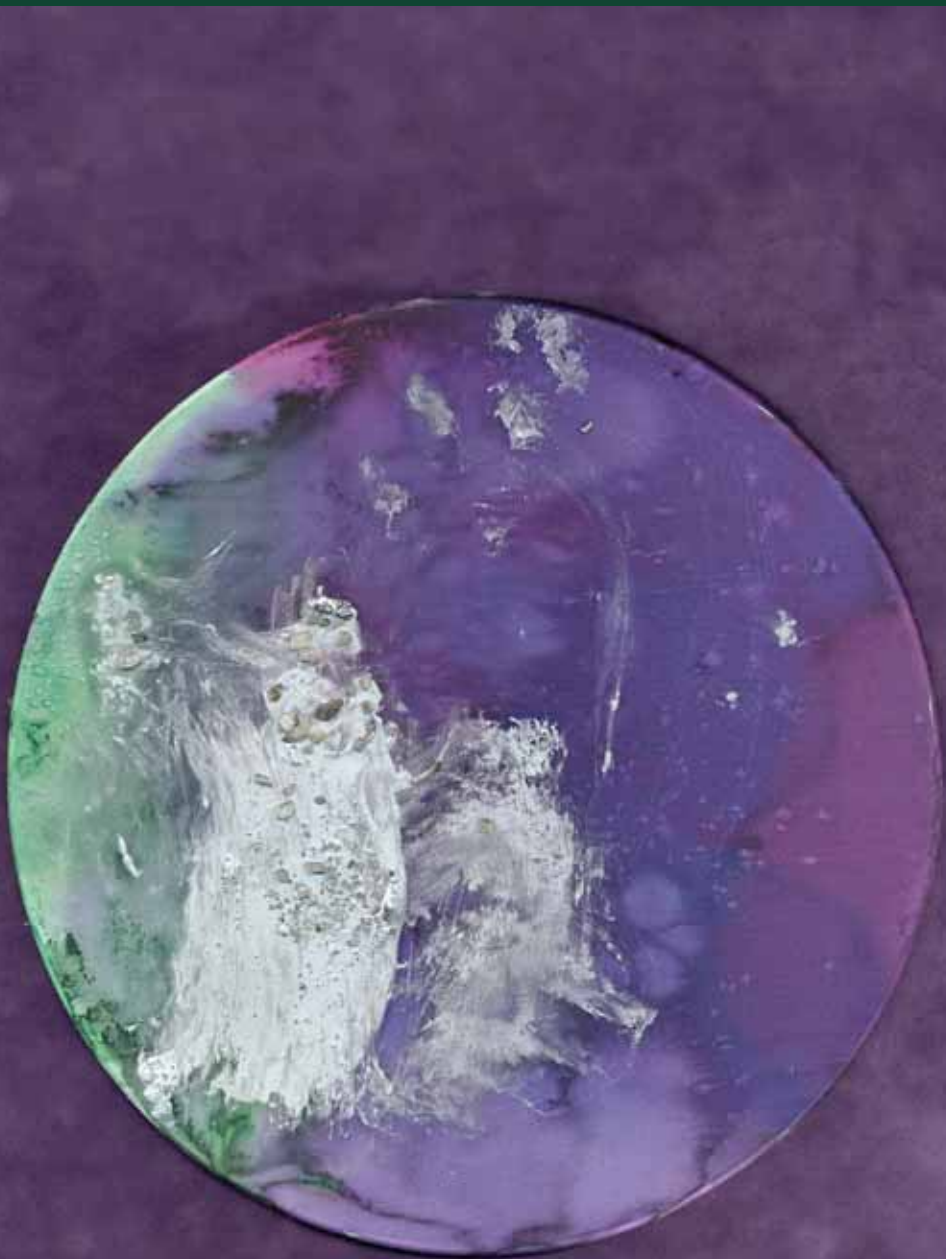

THE AMERICAN JOURNAL OF PSYCHIATRY

**Identity Crisis Involving  
Body Image in a Young Man  
With Autism**

Zachary E. Warren, Ph.D., et al. 1299

**Sibling Recurrence and the  
Genetic Epidemiology of Autism**

John N. Constantino, M.D., et al. 1349

**The Genetics of Autism  
Spectrum Disorders and Related  
Neuropsychiatric Disorders  
in Childhood**

Paul Lichtenstein, Ph.D., et al. 1357

**Association Between a  
High-Risk Autism Locus on  
5p14 and Social Communication  
Spectrum Phenotypes in the  
General Population**

Beate St. Pourcain, Ph.D., et al. 1364

**Continuing Medical Education** 1415

**November 2010**  
**Volume 167 • Number 11**

Official Journal of the  
AMERICAN PSYCHIATRIC ASSOCIATION

[ajp.psychiatryonline.org](http://ajp.psychiatryonline.org)
