# READ The American Journal of PSYCHIATRY ONLINE

## ONLINE BENEFITS

### AJP in Advance

Receive key research articles posted on the AJP website well in advance of their appearance in print.

### Back Issue Access

Gain access to back issues starting with Volume 1, Issue 1 of the American Journal of Insanity in 1844. (Available to institutions as a separate one-time purchase.)

### AJP CME

Take interactive quizzes that offer AMA PRA Category 1 Credits™ for selected articles from each issue (with paid subscription to the CME Course Program).

### AJP Audio

Listen to MP3-format program summarizing findings from key articles from each issue.

### Residents' Journal

Read additional AJP articles and features that have most value to residents in their training.

### Powerful Searching

Search by author, keyword, and/or citation details—within any one journal, across the entire PsychiatryOnline journal collection, or across all HighWire journals.

### PubMed, CrossRef, and Google Scholar links

Explore everything from cited references to abstracts and full text; to similar articles; to other articles by the same lead authors.

### eTOCs

Get advanced email alerts with the table of contents of the latest issue.

ACTIVATE  
NOW!

IT'S AS EASY AS...

2 Under  
SUBSCRIBE  
NOW, click  
"Activate  
Your Online  
Access"

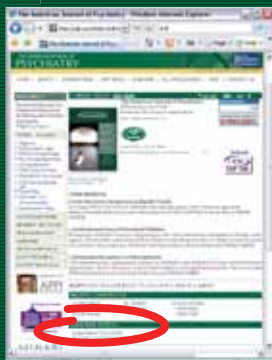

1

Go to [ajp.psychiatryonline.org](http://ajp.psychiatryonline.org)

3

Enter your APA Member Number. (This can be found on your mailing label.)

AJP 3000056866 CAR-RT LOT88 C-105  
John Q Sample  
Mental Health Professional  
1000 Wilson Blvd STE 1825  
Arlington VA 22209-3924 01654

\*In most cases the number on your label will be your Member Number; if it is not, enter your APA Member Number (with enough leading zeros to create 10 digits).

For more information or if you cannot locate your customer number, please contact APPI Customer Service:

1.800.368.5777  
APPI@PSYCH.ORG

# The Residents' JOURNAL

Last Issue's

## Table of Contents

- 1 In This Issue
- 2 *The Residents' Journal* and Review  
Joseph M. Cerimele, M.D.
- 3 The Basics of Grant Funding for the Young Investigator  
Doreen M. Olvet, Ph.D.
- 5 Routine Psychiatric Admission Labs: Do They Make Cents?  
Lance Feldman, M.D.
- 7 Residency and Research: A Personal Reflection  
Weronika Micula-Gondek, M.D.
- 8 Test Your Knowledge
- 9 Author Information for *Residents' Journal* Submissions

The Residents' Journal is sent free-of-charge to all psychiatry residents. Anyone interested in being included on the distribution list should contact Angela Moore, the Residents' Journal staff editor at [ajp@psych.org](mailto:ajp@psych.org) with "Subscribe to Residents' Journal" in the subject line.

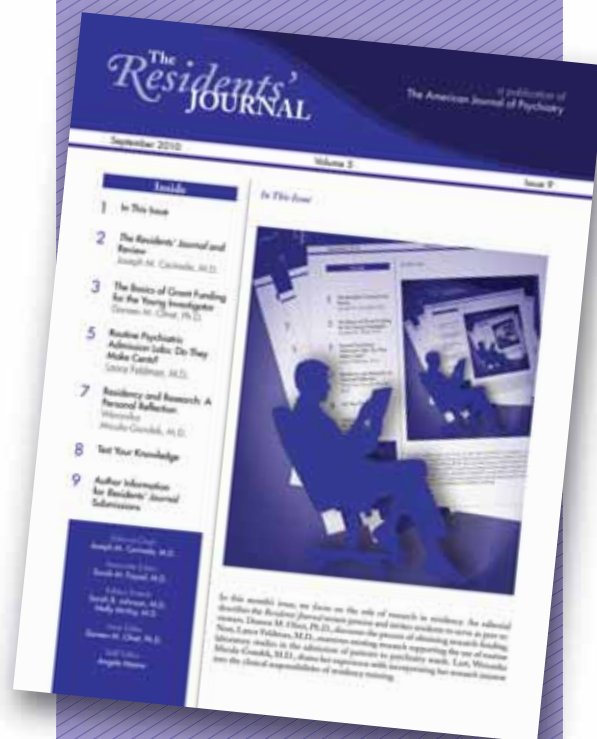

Upcoming Issue Themes  
October: Specialists in Psychiatry  
November: Art in the Realm of Psychiatry

a publication of  
The American Journal of Psychiatry

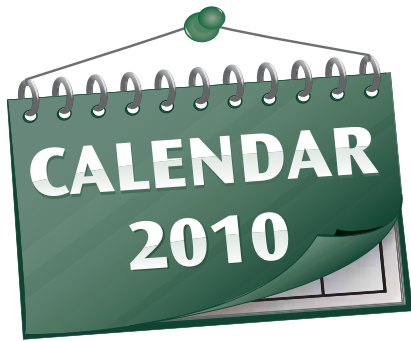

For free listing of your organization's official annual or regional meeting, please send us the following information: sponsor, location, inclusive dates, type and number of continuing education credits (if available), and the name, address, and telephone number of the person or group to contact for more information. In order for an event to appear in our listing, all notices and changes must be received at least 6 months in advance of the meeting and should be addressed to:

*Calendar, American Journal of Psychiatry, 1000 Wilson Boulevard, Suite 1825, Arlington, VA 22209-3901, [ajp@psych.org](mailto:ajp@psych.org) (e-mail).*

*Because of space limitations, only listings of meetings of the greatest interest to Journal readers will be included.*

---

## MAY 2011

**May 12–14**, 55th Annual Meeting of the American Academy of Psychoanalysis and Dynamic Psychiatry. Contact: AAPDP Executive Office, P.O. Box 30, Bloomfield, CT 06002; (888) 691-8281 (tel), (860) 286-0787 (fax), [info@aapdp.org](mailto:info@aapdp.org) (e-mail), [www.aapdp.org](http://www.aapdp.org) (web site).

**May 14–19**, 164th Annual Meeting of the American Psychiatric Association, Honolulu, HI. Contact: Cathy Nash, APA Annual Meetings Dept., 1000 Wilson Blvd., Ste. 1825, Arlington, VA 22209; (703) 907-7822.

**May 26–29**, 3rd International Congress on ADHD – From Childhood to Adult Disease, Berlin, Germany. Contact: Congress and Exhibition Office: CPO HANSER SERVICE, 011-49-40-670 88 20 (tel), [www.adhd-congress.org](http://www.adhd-congress.org) (web site), [adhd2011@cpo-hanser.de](mailto:adhd2011@cpo-hanser.de) (e-mail).

---

## OCTOBER

**October 5–8**, II International Congress, Dual Disorders, Addictive Behaviors and other Mental Disorders, Barcelona, Spain. Contact: SEPD, [www.cipd2011.com](http://www.cipd2011.com) (web site).

**October 18–23**, 58th Annual Meeting of the American Academy of Child and Adolescent Psychiatry, Toronto, Ontario. Contact: AACAP, 3615 Wisconsin Avenue, N.W., Washington, DC 20016-3007; (202) 966-7300 (tel), (202) 966-2891 (fax), [meetings@aacap.org](mailto:meetings@aacap.org) (e-mail), [www.aacap.org](http://www.aacap.org) (web site).

**October 27–30**, 63rd Institute on Psychiatric Services, American Psychiatric Association, San Francisco, CA. Contact: Jill Gruber, APA Annual Meetings Dept., 1000 Wilson Blvd., Ste. 1825, Arlington, VA 22209; (703) 907-7815.

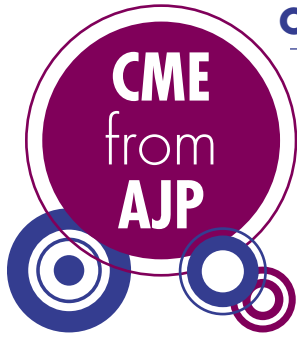

## Continuing Medical Education

Three articles in this issue form the basis of a short course with questions that can be answered for up to 1 *AMA PRA Category 1 Credit™* each by visiting <http://cme.psychiatryonline.org/> and clicking on “American Journal of Psychiatry CME.”

CME credit is issued only online, and a paid subscription to the AJP CME course program is required.

This month’s courses appear on pages 1415–1418.

FREE AUDIO!

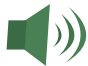

## Have You Heard?

You can listen to highlights of *The American Journal of Psychiatry* by downloading a monthly free .mp3 audio file from our web site (<http://ajp.psychiatryonline.org/misc/audio.dtl>) or by subscribing to the AJP Audio podcast at iTunes or other feed reader (e.g., NewzCrawler, FeedDemon, Bloglines, Google Reader). Presented by Deputy Editor Dr. Susan Schultz or by Editorial Director Michael Roy, each month’s audio lasts approximately 30 minutes and covers several research articles, the Treatment in Psychiatry feature, and one or two editorials.

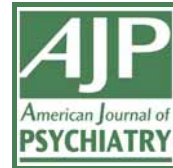

Coming in the December 2010 issue\*

## THE AMERICAN JOURNAL OF PSYCHIATRY

### ***Personalized Medicine for Depression: Can We Match Patients With Treatments?***

G.E. Simon and R.H. Perlis

### ***Hurtful Words: Association of Exposure to Peer Verbal Abuse With Elevated Psychiatric Symptom Scores and Corpus Callosum Abnormalities***

M.H. Teicher, J.A. Samson, Y.-S. Sheu, A. Polcari, and C.E. McGreenery

### ***National Trends in Outpatient Psychotherapy***

M. Olfson and S.C. Marcus

### ***Altering the Trajectory of Anxiety in At-Risk Young Children***

R.M. Rapee, S.J. Kennedy, M. Ingram, S.L. Edwards, and L. Sweeney

\*Can’t wait? Visit [ajp.psychiatryonline.org](http://ajp.psychiatryonline.org) and click the “AJP in Advance” logo to see all articles uploaded in advance of print!

## Contents

- A17 Editorial Board  
A19 Highlights of this issue

## Editorials

- 341 **From predisposition to illness: genetically sensitive intermediate pathways to mood disorders**  
A. Duffy
- 343 **Reflections on PTSD's future in DSM-V**  
G. M. Rosen, S. O. Lilienfeld, B. C. Frueh, P. R. McHugh and R. L. Spitzer
- 345 **Guidelines for the management of depression: NICE work?**  
T. Kendrick and R. Peveler
- 348 **Is the EQ-5D fit for purpose in mental health?**  
J. Brazier

## Review article

- 350 **Early intervention services, cognitive-behavioural therapy and family intervention in early psychosis: systematic review**  
V. Bird, P. Premkumar, T. Kendall, C. Whittington, J. Mitchell and E. Kuipers

- 356 **Strategy – poems by doctors**  
Peter Wells

## Papers

- 357 **Physical activity and common mental disorders**  
S. B. Harvey, M. Hotopf, S. Øverland and A. Mykletun
- 365 **Polymorphisms in *BDNF* (Val66Met) and *5-HTTLPR*, morning cortisol and subsequent depression in at-risk adolescents**  
I. M. Goodyer, T. Croudace, F. Dudbridge, M. Ban and J. Herbert

- 371 **Gaëtan Gatian de Clérambault, 1872–1934 – psychiatry in pictures**  
Vladimir Lerner and Eliezer Witztum

- 372 **Association of high-sensitivity C-reactive protein with *de novo* major depression**  
J. A. Pasco, G. C. Nicholson, L. J. Williams, F. N. Jacka, M. J. Henry, M. A. Kotowicz, H. G. Schneider, B. E. Leonard and M. Berk

- 377 **Destigmatising mental illness, House style – extra**  
Shabbir Amanullah

- 378 **Childhood adversities and adult psychopathology in the WHO World Mental Health surveys**  
R. C. Kessler, K. A. McLaughlin, J. G. Green, M. J. Gruber, N. A. Sampson, A. M. Zaslavsky, S. Aguilar-Gaxiola, A. O. Alhamzawi, J. Alonso, M. Angermeyer, C. Benjet, E. Bromet, S. Chatterji, G. de Girolamo, K. Demeyttenaere, J. Fayyad, S. Florescu, G. Gal, O. Gureje, J. M. Haro, C. Hu, E. G. Karam, N. Kawakami, S. Lee, J.-P. Lépine, J. Ormel, J. Posada-Villa, R. Sagar, A. Tsang, T. B. Üstün, S. Vassilev, M. C. Viana and D. R. Williams

- 386 **Quality of life of people with schizophrenia, bipolar disorder and other psychotic disorders**

S. I. Saarni, S. Viertiö, J. Perälä, S. Koskinen, J. Lönnqvist and J. Suvisaari

- 394 ***Shirley Hall Asylum: Or the Memoirs of a Monomaniac (1863) by William Gilbert (1804–1890) – psychiatrists in 19th-century fiction***  
Fiona Subotsky

- 395 **Economic costs and preference-based health-related quality of life outcomes associated with childhood psychiatric disorders**  
S. Petrou, S. Johnson, D. Wolke, C. Hollis, P. Kochhar and N. Marlow

- 405 **Mental health of UK military personnel while on deployment in Iraq**  
K. Mulligan, N. Jones, C. Woodhead, M. Davies, S. Wessely and N. Greenberg

## Short report

- 411 **Common mental disorders, subthreshold symptoms and disability: longitudinal study**  
D. Rai, P. Skapinakis, N. Wiles, G. Lewis and R. Araya

## Columns

- 413 Correspondence  
416 Correction  
417 Book reviews  
420 Contents of *Advances in Psychiatric Treatment*  
421 Contents of the *American Journal of Psychiatry*  
422 From the Editor's desk

## Cover picture

*The Gang* (2010). Lisa Biles (b. 1977)

Lisa has been drawing and painting for most of her life, but started taking it seriously when she studied art at school. She went on to achieve a Fine Art degree at Buckinghamshire Chilterns University College. Lisa writes: 'For me, my art is the only form of communication I feel comfortable with. Having suffered from anorexia nervosa, I have constantly found it difficult to communicate with society. I chose to isolate myself and created my own world where I became powerful, victorious and in control: a place where no one can hurt or poison my mind. The only way I can become indestructible is through painting. Painting is my life and my escape. I'd be extremely lost and frightened without it. This painting is to do with feelings of isolation and not having many friends, so I create my own fantasy world with figures and dolls that are from cartoons, films and popular culture. I often tackle issues of identity and image within my work. I use masks to disguise the characters in my paintings in order to represent that we all use something to hide behind. There is a tension between the playful characters and the threatening ones. The playful ones represent a sense of freedom, like being a kid again and not being judged by anyone, and the threatening ones represent a sense of power and entrapment'.

Image supplied by the Bethlem Gallery, London ([www.bethlemgallery.com](http://www.bethlemgallery.com)). With thanks to Beth Elliott.

We are always looking for interesting and visually appealing images for the cover of the *Journal* and would welcome suggestions or pictures, which should be sent to Dr Allan Beveridge, British Journal of Psychiatry, 17 Belgrave Square, London SW1X 8PG, UK or [bjp@rcpsych.ac.uk](mailto:bjp@rcpsych.ac.uk).

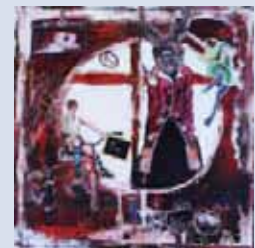

# get CME from AJP

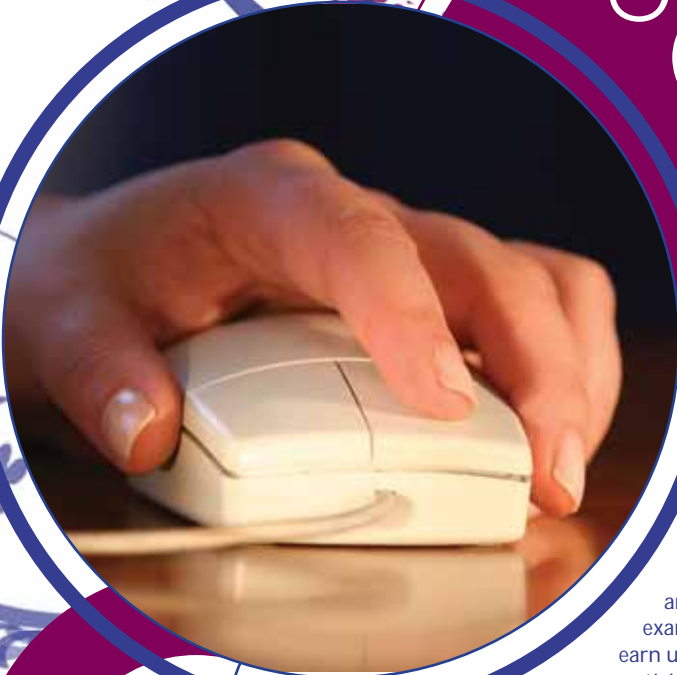

Brief companion exams are created for three of the most influential articles from each issue. By reading the articles and completing the online exams, you can test your knowledge and earn up to 1 *AMA PRA Category 1 Credit™* per article. Correct answers are highlighted for your reference upon completion of the course; there is no minimum threshold score necessary for the credit. A link from the question to the correct answer in context will also be highlighted in the associated article, thus extending the learning experience.

CME credit is only provided online, and a subscription to the AJP CME program is required. From the moment you subscribe to the AJP CME program, you will be able to select from 72 courses from among 40 possible subject areas. You'll also be able to access the next 33 courses as they become available. For more information and pricing, please go to <http://cme.psychiatryonline.org/misc/aboutajpcme.shtml>

This activity is sponsored by the American Psychiatric Association. The American Psychiatric Association is accredited by the Accreditation Council for Continuing Medical Education to provide continuing medical education for physicians. The American Psychiatric Association designates each educational activity for a maximum of 1 *AMA PRA Category 1 Credit™*. Physicians should only claim credit commensurate with the extent of their participation in the activity.

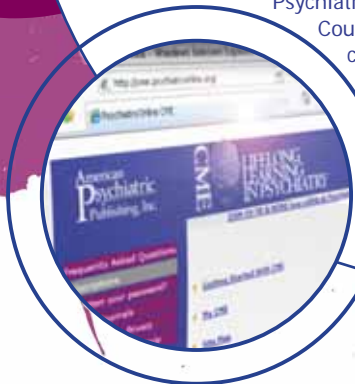

Fulfill your CME requirement while staying current on the latest advances in psychiatry.  
Subscribe to AJP CME!

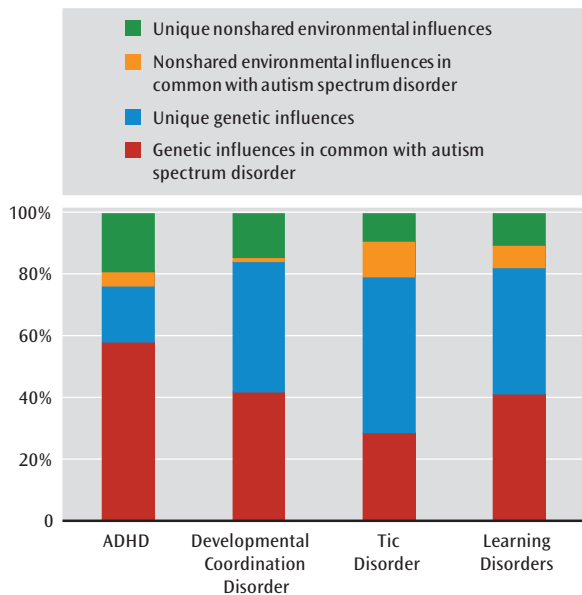

Autism spectrum disorder shares much of its genetic influence with other disorders (Lichtenstein et al., p. 1357)

## The Genetics of Autism

Traits and genetic factors associated with autism spectrum disorders are common in the general population and siblings of patients and are not limited to individuals with the actual diagnosis. Nor is the genetic influence limited to the autism spectrum. St. Pourcain et al. (CME, p. 1364) found that a genetic variant previously linked to the diagnosis influences the trait of social communication in the general population. Among 7,313 children ages 3–12 years, the variant was also associated with a profile including subthreshold impairments in social, communicative, and cognitive abilities. In 1,235 families with an autistic child, Constantino et al. (p. 1349) discovered that 20% of siblings classified as unaffected had language delays plus autistic speech. Such siblings were more common in families having multiple children diagnosed with autism spectrum disorders. The twin study by Lichtenstein et al. (p. 1357) showed that concordance rates for autism spectrum disorders, ADHD, developmental coordination disorder, and tic disorder were greater in monozygotic than dizygotic pairs. Cross-disorder effects were also greater in monozygotic pairs, and a substantial proportion of the genetic variance for autism spectrum disorders was shared with the other disorders (figure). The editorial by Kendler (p. 1291) points out that these findings have emerged because studies of the heritability of autism have encompassed larger numbers of families.

## Changing Views of Mental Illness?

Public awareness of the neurobiology of mental illness increased between 1996 and 2006, yet the stigma associated with several major mental disorders did not decline. Pescosolido et al. (p. 1321) found that persons who have a neurobiological conception of schizophrenia or depression

actually had increased likelihood of aversion or fear in their rating of vignettes of individuals with these illnesses. The perception of alcohol dependence as reflecting “bad character” rose from 49% to 65% of survey respondents. Support for treatment increased, however, and in an editorial, Goldman (p. 1289) suggests that the outcome of the study would have been different if the vignettes had included individuals who have recovered from mental illness.

### Clinical Guidance: Attachment to the Newborn Infant in Postpartum Depression

Maternal attachment to the newborn infant is often decreased in women who have postpartum depression. Moses-Kolko et al. (p. 1373) used functional magnetic resonance imaging to determine how these mothers perceive angry and sad faces. The left dorsolateral prefrontal cortex, which supports approach behaviors, was underactivated, and its normal connectivity to the left amygdala was not functional. Decreased activation of the left amygdala correlated with severity of depression, and decreased right amygdala activity correlated with the possibility of hostility to the infant. Brain activity in nonemotional tasks was intact. These findings might be of use to clinicians caring for these women to help patients and their families understand that lack of positive emotional reaction to the newborn’s needs has a neurobiological basis. Leibenluft and Yonkers in an editorial (p. 1294) point out that these problems do not necessarily abate when the depression is treated with medication and suggest that clinicians pay specific attention to the mother’s ability to respond emotionally to her baby.

### Clinical Guidance: Therapeutic Approach to Geriatric Depression With Executive Dysfunction

Geriatric patients with comorbid major depression and executive dysfunction have psychomotor retardation, apathy, lack of insight into their illness, and behavioral disability disproportionate to the level of their depression, according to Areán et al. (CME, p. 1391). Patients received 12 sessions of psychotherapy that taught steps in problem solving: identifying a difficult problem, setting goals, discussing and then evaluating different strategies to reach goals, creating action plans, and evaluating their effectiveness. This treatment produced a 47% remission rate, compared to 29% with supportive therapy alone. Time to remission correlated with attainment in problem-solving proficiency, generally after 9 to 12 weeks of therapy. Wetherell’s editorial (p. 1297) points out the increased effectiveness of psychotherapy that is targeted to the patient’s identified problem.
